# Supplementary figures and images for: The Female Urinary Microbiome: a Comparison of Women with and without Urgency Urinary Incontinence
Source: PubMed Central journal article supplement — mBio. 2014 Jul 8;5(4):e01283-14. doi: 10.1128/mBio.01283-14 (PMC4161260; doi:10.1128/mbio.01283-14), 2014-07-08

### Standard Culture Technique

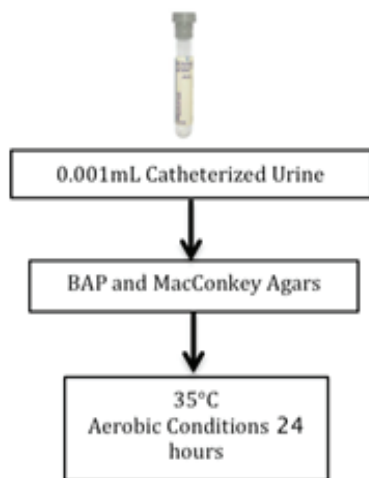

### Expanded Quantitative Culture Technique

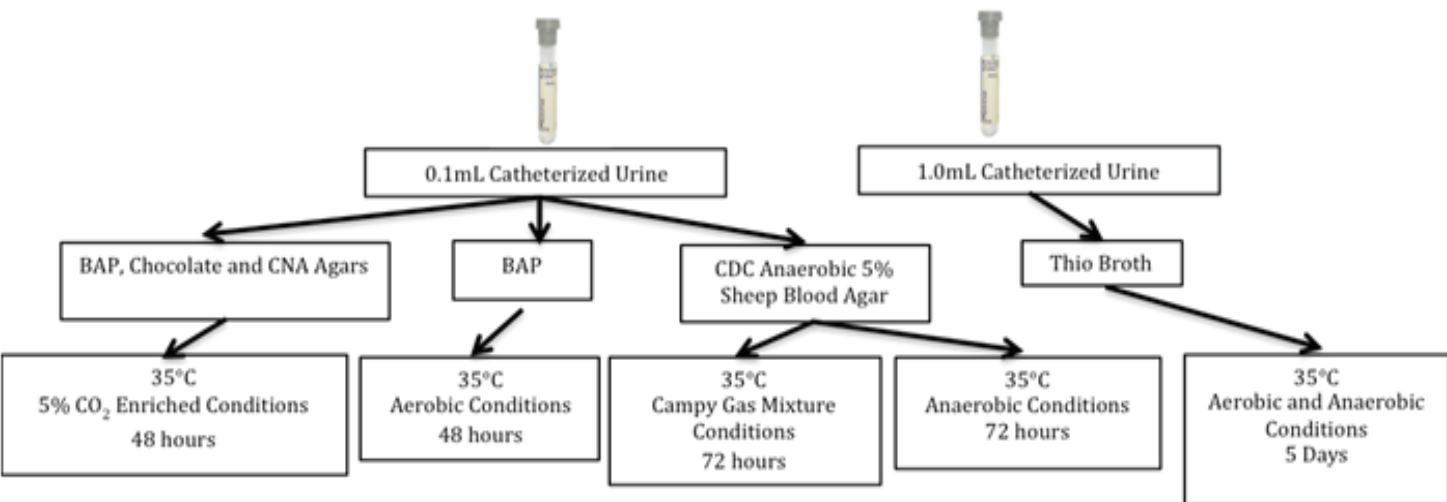

Supplement: mbo003141889sf01.pdf [file mbo003141889sf01.pdf]

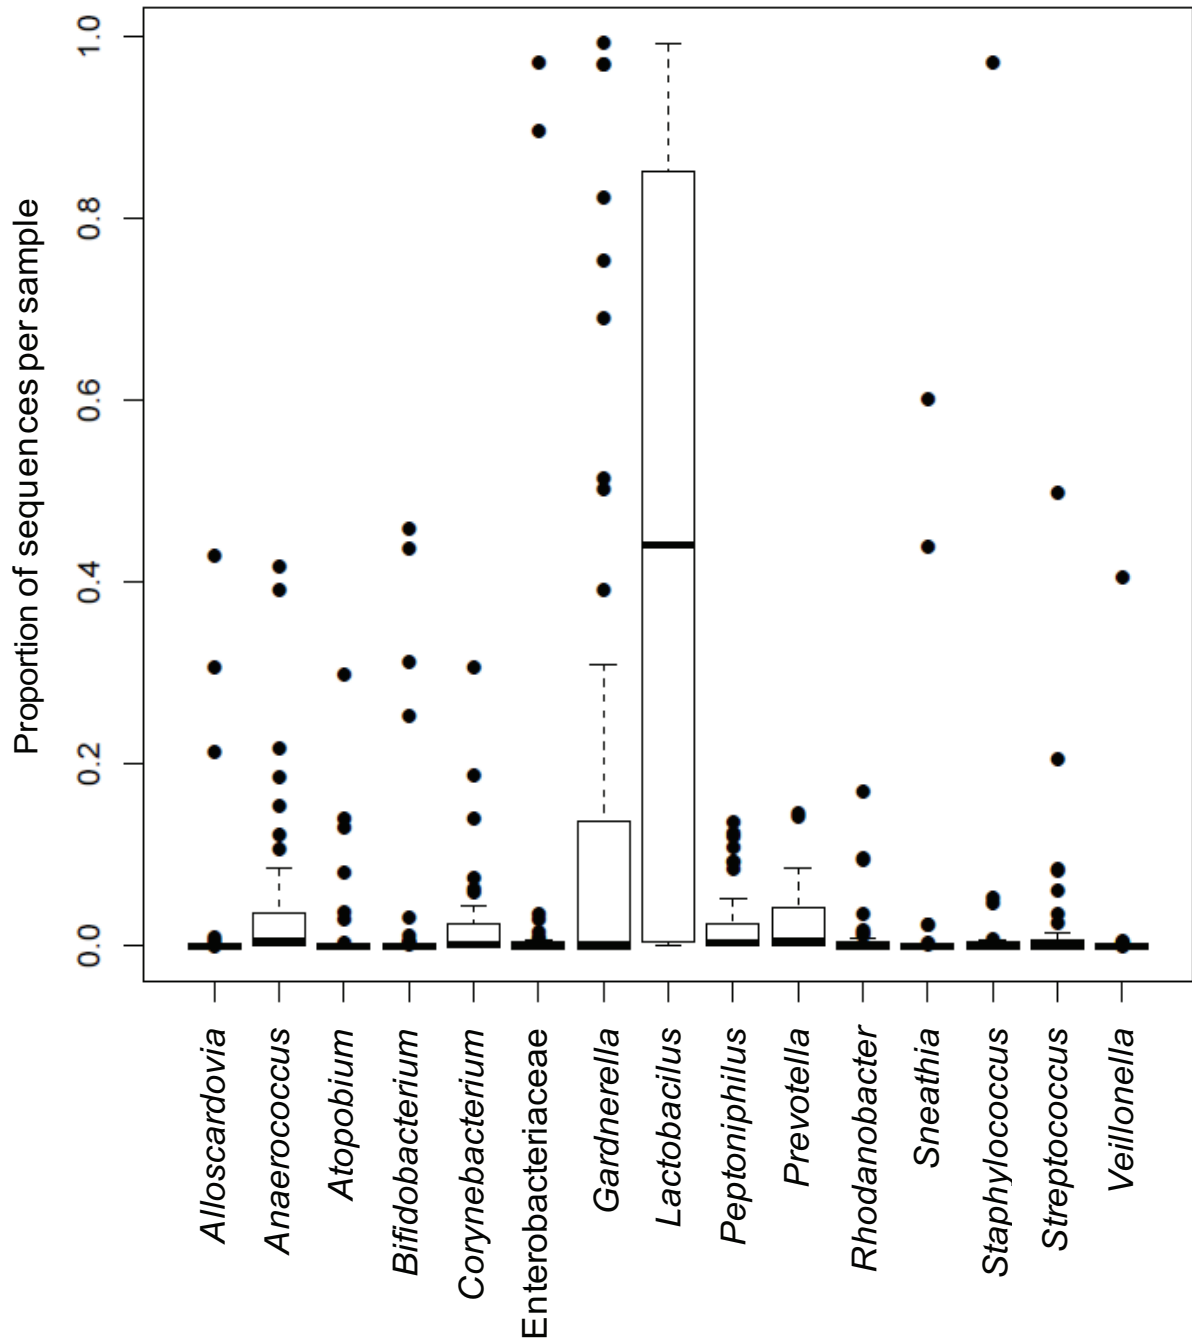

Supplement: mbo003141889sf02.pdf [file mbo003141889sf02.pdf]
